# Supplementary material for: The Influence of Daily Temperature Fluctuation on the Efficacy of Bioinsecticides on Spotted Wing Drosophila Larvae
Source: MDPI journal article supplement (doi:10.3390/insects14010043), 2022-12-31
Supplement: s1 [file s1]

# **The influence of daily temperature fluctuation on the efficacy of bioinsecticides on Spotted Wing *Drosophila* larvae**

Maristella Mastore<sup>1</sup>, Silvia Quadroni<sup>2</sup>, Alberto Rezzonico<sup>1</sup>, Maurizio Francesco Brivio<sup>1\*</sup>

<sup>1</sup>Lab. of Environmental Entomology and Parasitology, Dept. of Theoretical and Applied Sciences, University of Insubria, 21100 Varese, Italy

<sup>2</sup>Lab. of Ecology, Dept. of Theoretical and Applied Sciences, University of Insubria, 21100 Varese, Italy

\*Corresponding Author: Maurizio Francesco Brivio – e-mail: [maurizio.brivio@uninsubria.it](mailto:maurizio.brivio@uninsubria.it)

## **SUPPLEMENTARY MATERIAL**

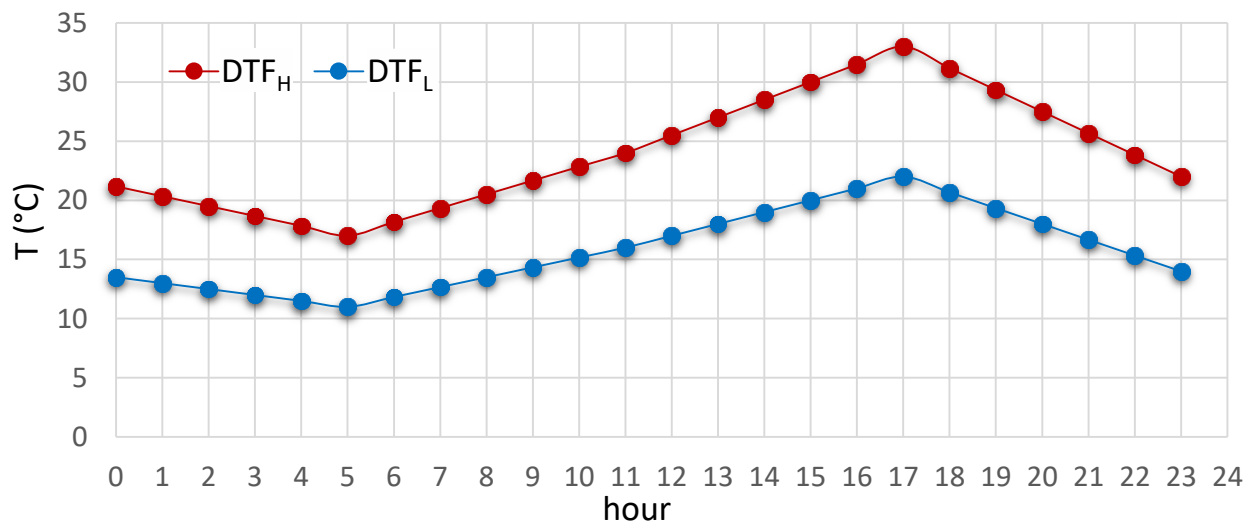

**Figure S1.** Thermal variation set in the climate chamber over 24 hours in the two temperature ranges,  $\text{DTF}_L$  11-22  $^{\circ}\text{C}$  and  $\text{DTF}_H$  17-33  $^{\circ}\text{C}$ .

**Table S1.** Pairwise comparisons of SWD mortality (estimated marginal means) after logistic regression (logit model), between different concentrations at the same time and temperature condition. Significant p-values are shown in bold. Cnt = control, C<sub>1</sub>-C<sub>5</sub> concentrations of Btk: 640, 1900, 3800, 7600 and 15200 IU/mL, nematodes: 100, 200, 400, 800 and 1600 IJ/mL

|    |                                  | Btk  |                    |      |                    | Sc   |                    |      |                    | Sf   |                    |      |                    | Hb   |                    |      |              |
|----|----------------------------------|------|--------------------|------|--------------------|------|--------------------|------|--------------------|------|--------------------|------|--------------------|------|--------------------|------|--------------|
|    |                                  | 24 h |                    | 48 h |                    | 24 h |                    | 48 h |                    | 24 h |                    | 48 h |                    | 24 h |                    | 48 h |              |
|    |                                  | Z    | p                  | Z    | p                  | Z    | p                  | Z    | p                  | Z    | p                  | Z    | P                  | Z    | p                  | Z    | p            |
| CT | Cnt vs C <sub>1</sub>            | 0.7  | 1.000              | 2.4  | 0.872              | 4.0  | <b>0.031</b>       | 3.7  | 0.103              | 3.8  | <b>0.041</b>       | 6.7  | <b>&lt; 0.0001</b> | 0.0  | 1.000              | 0.0  | 1.000        |
|    | Cnt vs C <sub>2</sub>            | 5.5  | <b>&lt; 0.0001</b> | 5.3  | <b>0.0002</b>      | 5.7  | <b>&lt; 0.0001</b> | 5.7  | <b>&lt; 0.0001</b> | 6.2  | <b>&lt; 0.0001</b> | 7.5  | <b>&lt; 0.0001</b> | 0.9  | 1.000              | 0.3  | 1.000        |
|    | Cnt vs C <sub>3</sub>            | 7.8  | <b>&lt; 0.0001</b> | 9.8  | <b>&lt; 0.0001</b> | 8.2  | <b>&lt; 0.0001</b> | 10.9 | <b>&lt; 0.0001</b> | 7.1  | <b>&lt; 0.0001</b> | 8.1  | <b>&lt; 0.0001</b> | 1.8  | 0.982              | 1.0  | 1.000        |
|    | Cnt vs C <sub>4</sub>            | 10.6 | <b>&lt; 0.0001</b> | 12.5 | <b>&lt; 0.0001</b> | 12.6 | <b>&lt; 0.0001</b> | 14.8 | <b>&lt; 0.0001</b> | 8.0  | <b>&lt; 0.0001</b> | 8.8  | <b>&lt; 0.0001</b> | 3.2  | 0.191              | 2.4  | 0.721        |
|    | Cnt vs C <sub>5</sub>            | 15.1 | <b>&lt; 0.0001</b> | 20.8 | <b>&lt; 0.0001</b> | 23.2 | <b>&lt; 0.0001</b> | 23.3 | <b>&lt; 0.0001</b> | 8.5  | <b>&lt; 0.0001</b> | 9.8  | <b>&lt; 0.0001</b> | 5.9  | <b>&lt; 0.0001</b> | 4.0  | <b>0.020</b> |
|    | C <sub>1</sub> vs C <sub>2</sub> | 4.8  | <b>0.002</b>       | 2.8  | 0.636              | 1.6  | 1.000              | 2.1  | 0.983              | 2.4  | 0.710              | 0.8  | 1.000              | 0.9  | 1.000              | 0.3  | 1.000        |
|    | C <sub>1</sub> vs C <sub>3</sub> | 7.2  | <b>&lt; 0.0001</b> | 7.3  | <b>&lt; 0.0001</b> | 4.2  | <b>0.021</b>       | 7.3  | <b>&lt; 0.0001</b> | 3.4  | 0.141              | 1.4  | 1.000              | 1.8  | 0.982              | 1.0  | 1.000        |
|    | C <sub>1</sub> vs C <sub>4</sub> | 10.0 | <b>&lt; 0.0001</b> | 10.0 | <b>&lt; 0.0001</b> | 8.6  | <b>&lt; 0.0001</b> | 11.1 | <b>&lt; 0.0001</b> | 4.3  | <b>0.009</b>       | 2.1  | 0.919              | 3.2  | 0.191              | 2.4  | 0.721        |
|    | C <sub>1</sub> vs C <sub>5</sub> | 14.4 | <b>&lt; 0.0001</b> | 18.3 | <b>&lt; 0.0001</b> | 19.2 | <b>&lt; 0.0001</b> | 19.6 | <b>&lt; 0.0001</b> | 4.7  | <b>0.001</b>       | 3.1  | 0.233              | 5.9  | <b>&lt; 0.0001</b> | 4.0  | <b>0.020</b> |
|    | C <sub>2</sub> vs C <sub>3</sub> | 2.4  | 0.900              | 4.5  | <b>0.006</b>       | 2.5  | 0.826              | 5.2  | <b>0.0003</b>      | 0.9  | 1.000              | 0.5  | 1.000              | 0.9  | 1.000              | 0.7  | 1.000        |
|    | C <sub>2</sub> vs C <sub>4</sub> | 5.2  | <b>0.0003</b>      | 7.2  | <b>&lt; 0.0001</b> | 7.0  | <b>&lt; 0.0001</b> | 9.0  | <b>&lt; 0.0001</b> | 1.8  | 0.980              | 1.3  | 1.000              | 2.3  | 0.802              | 2.2  | 0.875        |
|    | C <sub>2</sub> vs C <sub>5</sub> | 9.7  | <b>&lt; 0.0001</b> | 15.5 | <b>&lt; 0.0001</b> | 17.6 | <b>&lt; 0.0001</b> | 17.5 | <b>&lt; 0.0001</b> | 2.3  | 0.812              | 2.3  | 0.786              | 5.0  | <b>0.001</b>       | 3.8  | <b>0.046</b> |
|    | C <sub>3</sub> vs C <sub>4</sub> | 2.8  | 0.649              | 2.7  | 0.714              | 4.4  | <b>0.007</b>       | 3.8  | 0.065              | 0.9  | 1.000              | 0.7  | 1.000              | 1.4  | 0.999              | 1.4  | 0.999        |
|    | C <sub>3</sub> vs C <sub>5</sub> | 7.3  | <b>&lt; 0.0001</b> | 11.0 | <b>&lt; 0.0001</b> | 15.0 | <b>&lt; 0.0001</b> | 12.3 | <b>&lt; 0.0001</b> | 1.4  | 0.999              | 1.8  | 0.982              | 4.1  | <b>0.015</b>       | 3.0  | 0.301        |
|    | C <sub>4</sub> vs C <sub>5</sub> | 4.5  | <b>0.006</b>       | 8.3  | <b>&lt; 0.0001</b> | 10.6 | <b>&lt; 0.0001</b> | 8.5  | <b>&lt; 0.0001</b> | 0.5  | 1.000              | 1.1  | 1.000              | 2.7  | 0.550              | 1.6  | 0.996        |

|                  |                                  | Btk  |                    |      |                    | Sc   |                    |      |                    | Sf   |                    |      |                    |
|------------------|----------------------------------|------|--------------------|------|--------------------|------|--------------------|------|--------------------|------|--------------------|------|--------------------|
|                  |                                  | 24 h |                    | 48 h |                    | 24 h |                    | 48 h |                    | 24 h |                    | 48 h |                    |
|                  |                                  | Z    | p                  | Z    | p                  | Z    | p                  | Z    | p                  | Z    | p                  | Z    | p                  |
| DTF <sub>L</sub> | Cnt vs C <sub>1</sub>            | 3.5  | 0.150              | 4.6  | <b>0.003</b>       | 3.2  | 0.324              | 4.8  | <b>0.002</b>       | 1.4  | 0.999              | 3.6  | 0.077              |
|                  | Cnt vs C <sub>2</sub>            | 5.4  | <b>&lt; 0.0001</b> | 6.5  | <b>&lt; 0.0001</b> | 3.9  | <b>0.044</b>       | 5.4  | <b>&lt; 0.0001</b> | 4.4  | <b>0.006</b>       | 5.2  | <b>0.0003</b>      |
|                  | Cnt vs C <sub>3</sub>            | 6.9  | <b>&lt; 0.0001</b> | 10.2 | <b>&lt; 0.0001</b> | 5.0  | <b>0.001</b>       | 6.2  | <b>&lt; 0.0001</b> | 5.0  | <b>0.0005</b>      | 7.0  | <b>&lt; 0.0001</b> |
|                  | Cnt vs C <sub>4</sub>            | 8.6  | <b>&lt; 0.0001</b> | 11.9 | <b>&lt; 0.0001</b> | 5.8  | <b>&lt; 0.0001</b> | 7.8  | <b>&lt; 0.0001</b> | 5.9  | <b>&lt; 0.0001</b> | 7.7  | <b>&lt; 0.0001</b> |
|                  | Cnt vs C <sub>5</sub>            | 13.5 | <b>&lt; 0.0001</b> | 17.5 | <b>&lt; 0.0001</b> | 6.4  | <b>&lt; 0.0001</b> | 10.0 | <b>&lt; 0.0001</b> | 7.0  | <b>&lt; 0.0001</b> | 8.4  | <b>&lt; 0.0001</b> |
|                  | C <sub>1</sub> vs C <sub>2</sub> | 1.9  | 0.995              | 1.8  | 0.998              | 0.7  | 1.000              | 0.6  | 1.000              | 3.0  | 0.322              | 1.6  | 0.996              |
|                  | C <sub>1</sub> vs C <sub>3</sub> | 3.4  | 0.234              | 5.5  | <b>&lt; 0.0001</b> | 1.8  | 0.998              | 1.4  | 1.000              | 3.6  | 0.067              | 3.5  | 0.103              |
|                  | C <sub>1</sub> vs C <sub>4</sub> | 5.0  | <b>0.001</b>       | 7.3  | <b>&lt; 0.0001</b> | 2.6  | 0.774              | 3.0  | 0.463              | 4.5  | <b>0.003</b>       | 4.2  | <b>0.012</b>       |
|                  | C <sub>1</sub> vs C <sub>5</sub> | 10.0 | <b>&lt; 0.0001</b> | 12.9 | <b>&lt; 0.0001</b> | 3.2  | 0.336              | 5.2  | <b>0.0003</b>      | 5.6  | <b>&lt; 0.0001</b> | 4.8  | <b>0.001</b>       |
|                  | C <sub>2</sub> vs C <sub>3</sub> | 1.5  | 1.000              | 3.7  | 0.094              | 1.0  | 1.000              | 0.8  | 1.000              | 0.6  | 1.000              | 1.9  | 0.968              |
|                  | C <sub>2</sub> vs C <sub>4</sub> | 3.1  | 0.366              | 5.5  | <b>&lt; 0.0001</b> | 1.9  | 0.996              | 2.4  | 0.876              | 1.5  | 0.997              | 2.6  | 0.619              |
|                  | C <sub>2</sub> vs C <sub>5</sub> | 8.1  | <b>&lt; 0.0001</b> | 11.1 | <b>&lt; 0.0001</b> | 2.5  | 0.870              | 4.6  | <b>0.004</b>       | 2.6  | 0.590              | 3.2  | 0.188              |
|                  | C <sub>3</sub> vs C <sub>4</sub> | 1.7  | 0.999              | 1.8  | 0.999              | 0.8  | 1.000              | 1.6  | 1.000              | 0.9  | 1.000              | 0.7  | 1.000              |
|                  | C <sub>3</sub> vs C <sub>5</sub> | 6.7  | <b>&lt; 0.0001</b> | 7.4  | <b>&lt; 0.0001</b> | 1.4  | 1.000              | 3.8  | 0.068              | 2.0  | 0.948              | 1.4  | 1.000              |
|                  | C <sub>4</sub> vs C <sub>5</sub> | 5.0  | <b>0.001</b>       | 5.6  | <b>&lt; 0.0001</b> | 0.6  | 1.000              | 2.2  | 0.969              | 1.1  | 1.000              | 0.7  | 1.000              |

|                  |                                  | Btk  |                    |      |                    | Sc   |                    |      |                    | Hb   |              |      |              |
|------------------|----------------------------------|------|--------------------|------|--------------------|------|--------------------|------|--------------------|------|--------------|------|--------------|
|                  |                                  | 24 h |                    | 48 h |                    | 24 h |                    | 48 h |                    | 24 h |              | 48 h |              |
|                  |                                  | Z    | p                  | Z    | p                  | Z    | p                  | Z    | p                  | Z    | p            | Z    | p            |
| DTF <sub>H</sub> | Cnt vs C <sub>1</sub>            | 4.9  | <b>0.001</b>       | 5.0  | <b>0.001</b>       | 1.8  | 0.997              | 7.6  | <b>&lt; 0.0001</b> | 0.2  | 1.000        | 0.3  | 1.000        |
|                  | Cnt vs C <sub>2</sub>            | 6.6  | <b>&lt; 0.0001</b> | 7.1  | <b>&lt; 0.0001</b> | 5.4  | <b>0.0001</b>      | 8.3  | <b>&lt; 0.0001</b> | 0.6  | 1.000        | 0.9  | 1.000        |
|                  | Cnt vs C <sub>3</sub>            | 9.5  | <b>&lt; 0.0001</b> | 11.2 | <b>&lt; 0.0001</b> | 6.1  | <b>&lt; 0.0001</b> | 9.0  | <b>&lt; 0.0001</b> | 1.4  | 0.999        | 2.1  | 0.896        |
|                  | Cnt vs C <sub>4</sub>            | 10.5 | <b>&lt; 0.0001</b> | 13.1 | <b>&lt; 0.0001</b> | 7.3  | <b>&lt; 0.0001</b> | 14.0 | <b>&lt; 0.0001</b> | 3.0  | 0.335        | 3.0  | 0.300        |
|                  | Cnt vs C <sub>5</sub>            | 15.1 | <b>&lt; 0.0001</b> | 17.9 | <b>&lt; 0.0001</b> | 12.4 | <b>&lt; 0.0001</b> | 16.4 | <b>&lt; 0.0001</b> | 3.9  | <b>0.030</b> | 4.2  | <b>0.012</b> |
|                  | C <sub>1</sub> vs C <sub>2</sub> | 1.7  | 0.999              | 2.1  | 0.974              | 3.6  | 0.140              | 0.7  | 1.000              | 0.3  | 1.000        | 0.5  | 1.000        |
|                  | C <sub>1</sub> vs C <sub>3</sub> | 4.7  | <b>0.003</b>       | 6.1  | <b>&lt; 0.0001</b> | 4.3  | <b>0.013</b>       | 1.4  | 1.000              | 1.2  | 1.000        | 1.8  | 0.983        |
|                  | C <sub>1</sub> vs C <sub>4</sub> | 5.6  | <b>&lt; 0.0001</b> | 8.1  | <b>&lt; 0.0001</b> | 5.5  | <b>&lt; 0.0001</b> | 6.4  | <b>&lt; 0.0001</b> | 2.7  | 0.489        | 2.7  | 0.545        |
|                  | C <sub>1</sub> vs C <sub>5</sub> | 10.2 | <b>&lt; 0.0001</b> | 12.8 | <b>&lt; 0.0001</b> | 10.6 | <b>&lt; 0.0001</b> | 8.8  | <b>&lt; 0.0001</b> | 3.7  | 0.059        | 3.8  | <b>0.039</b> |
|                  | C <sub>2</sub> vs C <sub>3</sub> | 3.0  | 0.515              | 4.0  | <b>0.035</b>       | 0.7  | 1.000              | 0.7  | 1.000              | 0.9  | 1.000        | 1.3  | 1.000        |
|                  | C <sub>2</sub> vs C <sub>4</sub> | 3.9  | 0.051              | 5.9  | <b>&lt; 0.0001</b> | 1.9  | 0.994              | 5.7  | <b>&lt; 0.0001</b> | 2.4  | 0.747        | 2.1  | 0.886        |
|                  | C <sub>2</sub> vs C <sub>5</sub> | 8.5  | <b>&lt; 0.0001</b> | 10.7 | <b>&lt; 0.0001</b> | 7.0  | <b>&lt; 0.0001</b> | 8.1  | <b>&lt; 0.0001</b> | 3.3  | 0.153        | 3.3  | 0.167        |
|                  | C <sub>3</sub> vs C <sub>4</sub> | 0.9  | 1.000              | 1.9  | 0.994              | 1.2  | 1.000              | 5.0  | <b>0.001</b>       | 1.5  | 0.998        | 0.9  | 1.000        |
|                  | C <sub>3</sub> vs C <sub>5</sub> | 5.6  | <b>&lt; 0.0001</b> | 6.7  | <b>&lt; 0.0001</b> | 6.3  | <b>&lt; 0.0001</b> | 7.4  | <b>&lt; 0.0001</b> | 2.4  | 0.712        | 2.0  | 0.931        |
|                  | C <sub>4</sub> vs C <sub>5</sub> | 4.6  | <b>0.004</b>       | 4.8  | <b>0.002</b>       | 5.1  | <b>0.001</b>       | 2.3  | 0.921              | 0.9  | 1.000        | 1.1  | 1.000        |

**Table S2.** Pairwise comparisons of SWD mortality (estimated marginal means) after logistic regression (logit model), between different times at the same concentration and temperature condition. Significant p-values are shown in bold. Cnt = control, C<sub>1</sub>-C<sub>5</sub> concentrations of Btk: 640, 1900, 3800, 7600 and 15200 IU/mL, nematodes: 100, 200, 400, 800 and 1600 IJ/mL

|                  |                | Btk          |                    | Sc           |                    | Sf           |                    | Hb           |       |
|------------------|----------------|--------------|--------------------|--------------|--------------------|--------------|--------------------|--------------|-------|
|                  |                | 24 h vs 48 h |                    | 24 h vs 48 h |                    | 24 h vs 48 h |                    | 24 h vs 48 h |       |
|                  |                | Z            | p                  | Z            | p                  | Z            | p                  | Z            | p     |
| CT               | Cnt            | 2.6          | 0.769              | 2.9          | 0.564              | 4.5          | <b>0.004</b>       | 3.7          | 0.059 |
|                  | C <sub>1</sub> | 4.4          | <b>0.008</b>       | 2.5          | 0.840              | 7.4          | <b>&lt; 0.0001</b> | 3.7          | 0.059 |
|                  | C <sub>2</sub> | 2.4          | 0.887              | 3.0          | 0.508              | 5.7          | <b>&lt; 0.0001</b> | 3.0          | 0.305 |
|                  | C <sub>3</sub> | 4.5          | <b>0.005</b>       | 5.6          | <b>&lt; 0.0001</b> | 5.4          | <b>0.0001</b>      | 2.9          | 0.393 |
|                  | C <sub>4</sub> | 4.4          | <b>0.007</b>       | 5.0          | <b>0.001</b>       | 5.2          | <b>0.0002</b>      | 2.9          | 0.394 |
|                  | C <sub>5</sub> | 8.3          | <b>&lt; 0.0001</b> | 2.9          | 0.516              | 5.8          | <b>&lt; 0.0001</b> | 1.8          | 0.981 |
| DTF <sub>L</sub> | Cnt            | 0.3          | 1.000              | 0.4          | 1.000              | 0.4          | 1.000              |              |       |
|                  | C <sub>1</sub> | 1.4          | 1.000              | 2.0          | 0.986              | 2.6          | 0.588              |              |       |
|                  | C <sub>2</sub> | 1.4          | 1.000              | 1.9          | 0.996              | 1.2          | 1.000              |              |       |
|                  | C <sub>3</sub> | 3.6          | 0.122              | 1.6          | 1.000              | 2.5          | 0.701              |              |       |
|                  | C <sub>4</sub> | 3.7          | 0.103              | 2.4          | 0.876              | 2.3          | 0.834              |              |       |
|                  | C <sub>5</sub> | 4.3          | <b>0.012</b>       | 4.0          | <b>0.033</b>       | 1.8          | 0.974              |              |       |
| DTF <sub>H</sub> | Cnt            | 1.5          | 1.000              | 1.8          | 0.997              |              |                    | 1.5          | 0.998 |
|                  | C <sub>1</sub> | 1.6          | 1.000              | 7.6          | <b>&lt; 0.0001</b> |              |                    | 1.7          | 0.993 |
|                  | C <sub>2</sub> | 2.0          | 0.989              | 4.8          | <b>0.002</b>       |              |                    | 1.8          | 0.976 |
|                  | C <sub>3</sub> | 3.1          | 0.421              | 4.7          | <b>0.002</b>       |              |                    | 2.2          | 0.855 |
|                  | C <sub>4</sub> | 4.1          | <b>0.031</b>       | 8.6          | <b>&lt; 0.0001</b> |              |                    | 1.6          | 0.996 |
|                  | C <sub>5</sub> | 4.2          | <b>0.017</b>       | 5.8          | <b>&lt; 0.0001</b> |              |                    | 1.8          | 0.981 |

**Table S3.** Pairwise comparisons of SWD mortality (estimated marginal means) after logistic regression (logit model), between different temperature condition at the same time and concentration. Significant p-values are shown in bold. Cnt = control, C<sub>1</sub>-C<sub>5</sub> concentrations of Btk: 640, 1900, 3800, 7600 and 15200 IU/mL, nematodes: 100, 200, 400, 800 and 1600 IJ/mL

|                                      |      |                | Btk |          | Sc   |          | Sf  |          | Hb  |       |
|--------------------------------------|------|----------------|-----|----------|------|----------|-----|----------|-----|-------|
|                                      |      |                | Z   | p        | Z    | p        | Z   | p        | Z   | p     |
| CT vs DTF <sub>L</sub>               | 24 h | Cnt            | 0.7 | 1.000    | 0.4  | 1.000    | 1.5 | 0.997    |     |       |
|                                      |      | C <sub>1</sub> | 3.5 | 0.150    | 0.4  | 1.000    | 0.9 | 1.000    |     |       |
|                                      |      | C <sub>2</sub> | 0.3 | 1.000    | 1.3  | 1.000    | 0.3 | 1.000    |     |       |
|                                      |      | C <sub>3</sub> | 0.6 | 1.000    | 2.8  | 0.643    | 0.6 | 1.000    |     |       |
|                                      |      | C <sub>4</sub> | 1.4 | 1.000    | 6.4  | < 0.0001 | 0.6 | 1.000    |     |       |
|                                      |      | C <sub>5</sub> | 0.9 | 1.000    | 16.4 | < 0.0001 | 0.0 | 1.000    |     |       |
|                                      | 48 h | Cnt            | 1.6 | 1.000    | 2.0  | 0.985    | 2.5 | 0.667    |     |       |
|                                      |      | C <sub>1</sub> | 0.6 | 1.000    | 0.9  | 1.000    | 5.6 | < 0.0001 |     |       |
|                                      |      | C <sub>2</sub> | 0.4 | 1.000    | 2.4  | 0.902    | 4.8 | 0.001    |     |       |
|                                      |      | C <sub>3</sub> | 1.2 | 1.000    | 6.8  | < 0.0001 | 3.5 | 0.092    |     |       |
|                                      |      | C <sub>4</sub> | 2.2 | 0.968    | 9.0  | < 0.0001 | 3.5 | 0.086    |     |       |
|                                      |      | C <sub>5</sub> | 4.9 | 0.001    | 15.3 | < 0.0001 | 3.9 | 0.025    |     |       |
| CT vs DTF <sub>H</sub>               | 24 h | Cnt            | 1.7 | 0.999    | 1.8  | 0.998    |     |          | 2.4 | 0.744 |
|                                      |      | C <sub>1</sub> | 6.0 | < 0.0001 | 0.4  | 1.000    |     |          | 2.6 | 0.584 |
|                                      |      | C <sub>2</sub> | 2.9 | 0.567    | 1.5  | 1.000    |     |          | 2.1 | 0.924 |
|                                      |      | C <sub>3</sub> | 3.4 | 0.186    | 0.3  | 1.000    |     |          | 2.1 | 0.924 |
|                                      |      | C <sub>4</sub> | 1.6 | 1.000    | 3.5  | 0.146    |     |          | 2.1 | 0.891 |
|                                      |      | C <sub>5</sub> | 1.7 | 0.999    | 9.0  | < 0.0001 |     |          | 0.4 | 1.000 |
|                                      | 48 h | Cnt            | 0.6 | 1.000    | 0.7  | 1.000    |     |          | 0.3 | 1.000 |
|                                      |      | C <sub>1</sub> | 3.1 | 0.365    | 4.7  | 0.003    |     |          | 0.6 | 1.000 |
|                                      |      | C <sub>2</sub> | 2.5 | 0.857    | 3.3  | 0.252    |     |          | 0.9 | 1.000 |
|                                      |      | C <sub>3</sub> | 2.0 | 0.991    | 1.2  | 1.000    |     |          | 1.4 | 0.999 |
|                                      |      | C <sub>4</sub> | 1.2 | 1.000    | 0.02 | 1.000    |     |          | 0.8 | 1.000 |
|                                      |      | C <sub>5</sub> | 2.3 | 0.923    | 6.2  | < 0.0001 |     |          | 0.4 | 1.000 |
| DTF <sub>L</sub> vs DTF <sub>H</sub> | 24 h | Cnt            | 1.1 | 1.000    | 1.4  | 1.000    |     |          |     |       |
|                                      |      | C <sub>1</sub> | 2.4 | 0.884    | 0.0  | 1.000    |     |          |     |       |
|                                      |      | C <sub>2</sub> | 2.2 | 0.951    | 2.8  | 0.619    |     |          |     |       |
|                                      |      | C <sub>3</sub> | 3.7 | 0.083    | 2.5  | 0.839    |     |          |     |       |
|                                      |      | C <sub>4</sub> | 3.0 | 0.478    | 2.9  | 0.582    |     |          |     |       |
|                                      |      | C <sub>5</sub> | 2.6 | 0.764    | 7.4  | < 0.0001 |     |          |     |       |
|                                      | 48 h | Cnt            | 2.2 | 0.960    | 2.8  | 0.649    |     |          |     |       |
|                                      |      | C <sub>1</sub> | 2.6 | 0.792    | 5.6  | < 0.0001 |     |          |     |       |
|                                      |      | C <sub>2</sub> | 2.9 | 0.560    | 5.7  | < 0.0001 |     |          |     |       |
|                                      |      | C <sub>3</sub> | 3.2 | 0.324    | 5.6  | < 0.0001 |     |          |     |       |
|                                      |      | C <sub>4</sub> | 3.4 | 0.219    | 9.0  | < 0.0001 |     |          |     |       |
|                                      |      | C <sub>5</sub> | 2.5 | 0.822    | 9.2  | < 0.0001 |     |          |     |       |

**Table S4.** Lethal concentrations (LC<sub>50</sub> and LC<sub>90</sub>) of Btk on SWD at 48 h for all temperature conditions, calculated by Probit analysis with 95% confidence intervals (CI<sub>95%</sub>). Significant p-values are shown in bold.

|                        | LC <sub>50</sub> | CI <sub>95%</sub> - LC <sub>50</sub> | LC <sub>90</sub> | CI <sub>95%</sub> - LC <sub>90</sub> | $\chi^2$ | p                  |
|------------------------|------------------|--------------------------------------|------------------|--------------------------------------|----------|--------------------|
| <b>CT</b>              | 4876             | 4363-5445                            | 10713            | 9693-12038                           | 185      | <b>&lt; 0.0001</b> |
| <b>DTF<sub>L</sub></b> | 6768             | 6039-7589                            | 15520            | 13980-17543                          | 176      | <b>&lt; 0.0001</b> |
| <b>DTF<sub>H</sub></b> | 3915             | 3286-4558                            | 11800            | 10548-13463                          | 156      | <b>&lt; 0.0001</b> |
